# Supplementary material
Source: PubMed Central journal article supplement (PMC5710199)
Supplement: jamaophthalmol-135-769-s001.pdf [file jamaophthalmol-135-769-s001.pdf]

## Supplementary Online Content

Mombaerts I, Bilyk JR, Rose GE, et al; for the Expert Panel of the Orbital Society. Consensus on diagnostic criteria of idiopathic orbital inflammation using a modified Delphi approach. *JAMA Ophthalmol*. Published online June 1, 2017. doi:10.1001/jamaophthalmol.2017.1581

**eTable 1.** Questionnaire and Scores of the First Delphi Round

**eTable 2.** Questionnaire and Scores of the Second Delphi Round

**eFigure.** The Initial Diagnostic Steps (With or Without Serology) Among Experts (N = 27), for Suspected IOI in the Lacrimal Gland, Muscle, or Orbital Fat

This supplementary material has been provided by the authors to give readers additional information about their work.

**eTable 1.** Questionnaire and Scores of the First Delphi Round

|                                                                                                              | <b>Median</b> | <b>IQR</b> | <b>No. Positive Responders*</b> | <b>Consensus on</b> |
|--------------------------------------------------------------------------------------------------------------|---------------|------------|---------------------------------|---------------------|
| <b>The following clinical and radiologic imaging findings are indicative of idiopathic dacryoadenitis:</b>   |               |            |                                 |                     |
| Age between 10 and 75 years                                                                                  | 4             | 1          | 18 (67%)                        | Agreement           |
| No history of lacrimal-gland related systemic disease                                                        | 5             | 1          | 24 (89%)                        | Agreement           |
| Acute or subacute onset                                                                                      | 4             | 0          | 24 (89%)                        | Agreement           |
| Duration > 6 weeks                                                                                           | 3             | 2          | 11 (41%)                        | None                |
| Orbital pain                                                                                                 | 4             | 1          | 24 (85%)                        | Agreement           |
| Superotemporal (epi)scleritis                                                                                | 3             | 2          | 10 (37%)                        | None                |
| Unilateral                                                                                                   | 4             | 1          | 17 (63%)                        | Agreement           |
| Diffuse lacrimal gland swelling                                                                              | 4             | 1          | 23 (85%)                        | Agreement           |
| Irregular margins of the lacrimal gland mass                                                                 | 3             | 1          | 12 (44%)                        | Neutral             |
| Contrast enhancement                                                                                         | 4             | 1          | 24 (89%)                        | Agreement           |
| Intact lacrimal bone                                                                                         | 5             | 1          | 25 (93%)                        | Agreement           |
| Extension in adjacent extraocular muscle, eyelid and/or extraconal fat                                       | 3             | 1          | 13 (48%)                        | Neutral             |
| Normal ipsilateral paranasal sinus                                                                           | 4             | 2          | 20 (74%)                        | None                |
| Absence of infra- and supraorbital nerve enlargement                                                         | 4             | 1          | 21 (78%)                        | Agreement           |
| <b>The following clinical and radiologic imaging findings are indicative of idiopathic orbital myositis:</b> |               |            |                                 |                     |
| Age between 10 and 60 years                                                                                  | 4             | 1          | 18 (67%)                        | Agreement           |
| Acute or subacute onset                                                                                      | 4             | 1          | 24 (89%)                        | Agreement           |
| No history of thyroid disease                                                                                | 4             | 4          | 24 (89%)                        | Agreement           |
| Orbital pain                                                                                                 | 5             | 1          | 25 (93%)                        | Agreement           |
| Pain on eye movements                                                                                        | 5             | 1          | 26 (96%)                        | Agreement           |
| Limited eye movements                                                                                        | 4             | 1          | 23 (85%)                        | Agreement           |
| (Epi)scleritis at insertion of involved muscle                                                               | 4             | 2          | 19 (70%)                        | None                |
| Any extraocular muscle affected                                                                              | 4             | 1          | 25 (93%)                        | Agreement           |
| Diffuse extraocular muscle swelling                                                                          | 4             | 0          | 24 (89%)                        | Agreement           |

|                                                                                                                       |               |            |                                 |                     |
|-----------------------------------------------------------------------------------------------------------------------|---------------|------------|---------------------------------|---------------------|
| Anterior tendon involved                                                                                              | 4             | 0.5        | 20 (74%)                        | Agreement           |
| Contrast enhancement                                                                                                  | 4             | 1          | 23 (85%)                        | Agreement           |
| Normal ipsilateral paranasal sinus                                                                                    | 4             | 1.75       | 17 (63%)                        | None                |
| Absence of supra- and infraorbital nerve enlargement                                                                  | 4             | 1          | 22 (81%)                        | Agreement           |
| Absence of superior ophthalmic vein enlargement                                                                       | 4             | 1.5        | 19 (70%)                        | None                |
| <b>The following clinical and radiologic imaging findings are indicative of idiopathic orbital fat inflammation :</b> |               |            |                                 |                     |
| Age between 10 and 75 years                                                                                           | 4             | 1          | 14 (67%)                        | Agreement           |
| No history of orbital-related systemic disease                                                                        | 4             | 1          | 23 (92%)                        | Agreement           |
| Acute or subacute onset                                                                                               | 4             | 1          | 23 (92%)                        | Agreement           |
| Orbital pain                                                                                                          | 4             | 1          | 20 (80%)                        | Agreement           |
| Unilateral                                                                                                            | 4             | 1          | 16 (64%)                        | Agreement           |
| Diffuse orbital mass                                                                                                  | 4             | 1          | 17 (71%)                        | Agreement           |
| Irregular margins of the orbital fat mass                                                                             | 4             | 1          | 19 (79%)                        | Agreement           |
| Contrast enhancement                                                                                                  | 4             | 0.5        | 22 (92%)                        | Agreement           |
| Adjacent extraocular muscle or lacrimal gland invasion                                                                | 4             | 1          | 16 (67%)                        | Agreement           |
| Absence of supra- and infraorbital nerve enlargement                                                                  | 4             | 2          | 16 (63%)                        | None                |
| Normal ipsilateral paranasal sinus                                                                                    | 4             | 1          | 16 (64%)                        | Agreement           |
| Intact orbital bones                                                                                                  | 4             | 1          | 23 (93%)                        | Agreement           |
| <b>The following histopathological and immunohistochemical findings are indicative of idiopathic dacryoadenitis :</b> | <b>Median</b> | <b>IQR</b> | <b>No. Positive Responders*</b> | <b>Consensus on</b> |
| Fibrosis                                                                                                              | 4             | 1          | 13 (65%)                        | Agreement           |
| Lymphoplasmacytic infiltrate                                                                                          | 4             | 1          | 24 (96%)                        | Agreement           |
| Lymphoid follicles with reactive germinal centers                                                                     | 4             | 2          | 13 (52%)                        | None                |
| Acini and/or duct destruction                                                                                         | 3             | 1.5        | 9 (38%)                         | None                |
| Absence of granulomatous inflammation, necrosis and/or vasculitis                                                     | 5             | 1          | 19 (79%)                        | Agreement           |
| Absence of epimyoeptithelial islands                                                                                  | 4             | 1.25       | 18 (75%)                        | Agreement           |
| If plasma cells stain IgG4                                                                                            | 3             | 1          | 10 (38%)                        | Neutral             |

|                                                                                                                                 |   |      |           |           |
|---------------------------------------------------------------------------------------------------------------------------------|---|------|-----------|-----------|
| positive, the IgG4+/IgG ratio is $\leq 40\%$ , or the count is $\leq 100/\text{hpf}$                                            |   |      |           |           |
| <b>The following histopathological and immunohistochemical findings are indicative of idiopathic orbital myositis :</b>         |   |      |           |           |
| Absence of fibrosis                                                                                                             | 3 | 2    | 9 (41%)   | None      |
| Lymphoplasmacytic infiltrate                                                                                                    | 4 | 1    | 25 (100%) | Agreement |
| Lymphoid follicles with reactive germinal centers                                                                               | 3 | 2    | 8 (32%)   | None      |
| Degeneration of myofibers                                                                                                       | 3 | 1    | 9 (38%)   | Neutral   |
| Absence of granulomatous inflammation, necrosis and/or vasculitis                                                               | 4 | 1.5  | 17 (68%)  | None      |
| If plasma cells stain IgG4-positive, the IgG4+/IgG ratio is $\leq 40\%$ , or the count is $\leq 10/\text{hpf}$                  | 4 | 1    | 10 (40%)  | None      |
| <b>The following histopathological and immunohistochemical findings are indicative of idiopathic orbital fat inflammation :</b> |   |      |           |           |
| Fibrosis                                                                                                                        | 4 | 1    | 12 (57%)  | None      |
| Lymphoplasmacytic infiltrate                                                                                                    | 4 | 1    | 23 (96%)  | Agreement |
| Lymphoid follicles with reactive germinal centers                                                                               | 4 | 1.25 | 13 (54%)  | None      |
| Absence of granulomatous inflammation, necrosis and/or vasculitis                                                               | 4 | 1.25 | 18 (75%)  | None      |
| If plasma cells stain IgG4-positive, the IgG4+/IgG ratio is $\leq 40\%$ , or the count is $\leq 10/\text{hpf}$                  | 4 | 1    | 11 (46%)  | None      |

\*a positive responder implies a 4 or 5 Likert-rating  
IQR = interquartile range; IgG4 = immunoglobulin G4.

**eTable 2. Questionnaire and Scores of the Second Delphi Round**

|                                                                                                                                                                                     | Median | IQR | No. Positive Responders* | Consensus on |
|-------------------------------------------------------------------------------------------------------------------------------------------------------------------------------------|--------|-----|--------------------------|--------------|
| <b>The most accurate assessment of non-myositic IOI is based on clinical indicators, MRI or CT studies, selected normal laboratory findings, and incisional biopsy.</b>             | 5      | 0   | 24 (89%)                 | Agreement    |
| <b>The most accurate assessment of non-myositic IOI is based on clinical indicators, MRI or CT studies, selected normal laboratory findings, and corticosteroid responsiveness.</b> | 3      | 2   | 12 (44%)                 | None         |
| <b>Diagnostic confirmation by biopsy in non-myositic IOI is always recommended, for the exclusion of malignancy and other IOI mimics.</b>                                           | 4      | 2   | 17 (63%)                 | None         |
| <b>The most accurate assessment of myositic IOI is based on clinical indicators, MRI or CT studies, selected normal laboratory findings, and corticosteroid responsiveness.</b>     | 4      | 1   | 22 (85%)                 | Agreement    |
| <b>Diagnostic confirmation by biopsy in myositic IOI is always recommended, for the exclusion of malignancy and other myositis mimics.</b>                                          | 4      | 3   | 15 (56%)                 | None         |
| <b>Re-rating of round I and newly suggested indicators of IOI</b>                                                                                                                   |        |     |                          |              |
| Prodromal ache shortly before eyelid swelling                                                                                                                                       | 3      | 0.5 | 7 (26%)                  | Neutral      |
| S-shaped upper eyelid ptosis (in idiopathic dacryoadenitis)                                                                                                                         | 3      | 1   | 13 (48%)                 | Neutral      |
| Red demarcation line under the brow (in nonmyositic IOI)                                                                                                                            | 3      | 0.5 | 5 (19%)                  | Neutral      |
| No process outside the orbit                                                                                                                                                        | 3      | 1.7 | 4 (27%)                  | None         |
| Response to systemic NSAID (in idiopathic dacryoadenitis)                                                                                                                           | 3      | 1.7 | 4 (29%)                  | None         |
| (Epi-)scleritis overlying the involved structure                                                                                                                                    | 3      | 1   | 12 (44%)                 | Neutral      |
| Normal adjacent sinus                                                                                                                                                               | 4      | 1   | 17 (68%)                 | Agreement    |
| Absence of superior ophthalmic vein enlargement                                                                                                                                     | 3      | 1   | 12 (44%)                 | Neutral      |
| Normal size of supra- and infraorbital nerve                                                                                                                                        | 3      | 1   | 13 (48%)                 | Neutral      |
| Lymphoid follicles with germinative centers                                                                                                                                         | 3      | 1.5 | 10 (37%)                 | None         |

|                                                                                                                                                                                                                                                                                                 |                             |   |                             |           |
|-------------------------------------------------------------------------------------------------------------------------------------------------------------------------------------------------------------------------------------------------------------------------------------------------|-----------------------------|---|-----------------------------|-----------|
| Absence of granulomatous inflammation, necrosis, and/or vasculitis                                                                                                                                                                                                                              | 4                           | 1 | 21 (78%)                    | Agreement |
| Acini/duct destruction (in lacrimal gland)                                                                                                                                                                                                                                                      | 3                           | 1 | 9 (33%)                     | Neutral   |
| Absence of epimyoeptithelial islands                                                                                                                                                                                                                                                            | 3                           | 0 | 6 (23%)                     | Neutral   |
| <b>When IgG4-positive plasma cell infiltrates are present in the biopsy specimens - in a context of clinical, radiological and pathological indicators of IOI -, which threshold is still compatible with IOI: IgG4+/IgG ratio is ≤40%, or</b><br><br>≤10/hpf<br>≤30/hpf<br>≤50/hpf<br>≤100/hpf | <b>Lacrimal gland</b>       |   | <b>Orbital fat/ muscle</b>  |           |
|                                                                                                                                                                                                                                                                                                 | 36.50/hpf<br>(weighted sum) |   | 27.22/hpf<br>(weighted sum) |           |

\*a positive responder implies a 4 or 5 Likert-rating

IQR = interquartile range; IOI : idiopathic orbital inflammation, MRI = magnetic resonance imaging; CT = computerized tomography; IgG4 = immunoglobulin G4; hpf = high-power field

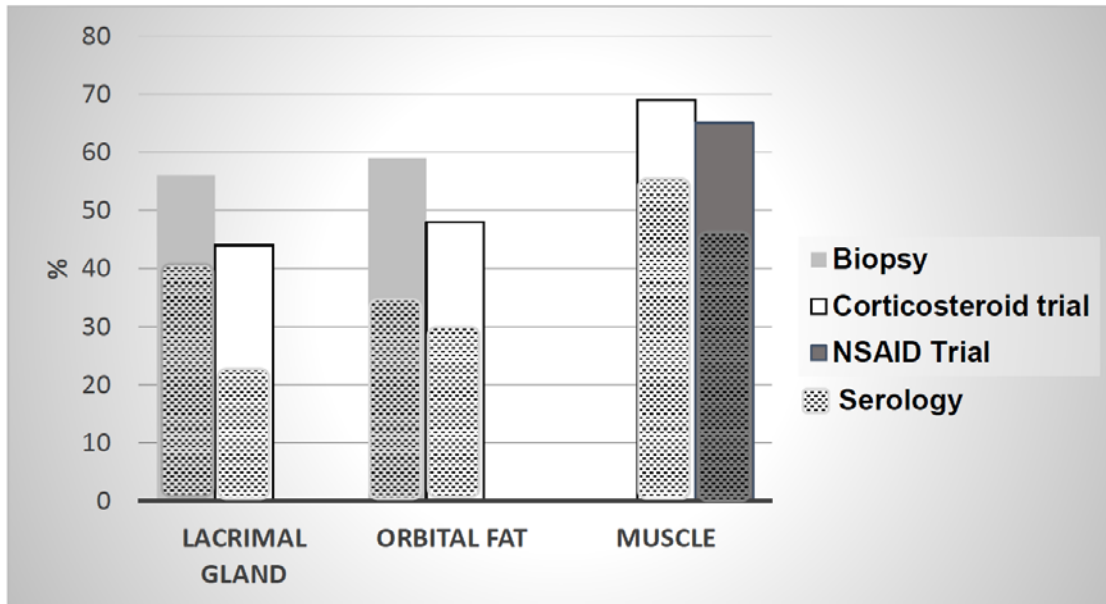

**eFigure.** The Initial Diagnostic Steps (With or Without Serology) Among Experts (N = 27), for Suspected IOI in the Lacrimal Gland, Muscle, or Orbital Fat

The question comprised: If idiopathic dacryoadenitis/idiopathic orbital fat inflammation\*/idiopathic orbital myositis is suspected based on the clinical and radiological context, which of the following are your initial diagnostic step(s):

Tissue biopsy\*

Corticosteroid trial

NSAID trial

Inflammatory and autoimmune serology

NSAID = nonsteroidal anti-inflammatory drugs. \*No biopsy for lesions in the orbital apex or on the optic nerve.
